# Supplementary material for: ACPT gene is inactivated in mammalian lineages that lack enamel or teeth
Source: PeerJ journal article supplement (doi:10.7717/peerj.10219), 2021-01-22
Supplement: Supplementary_Figures.pdf [file Supplementary_Figures.pdf]

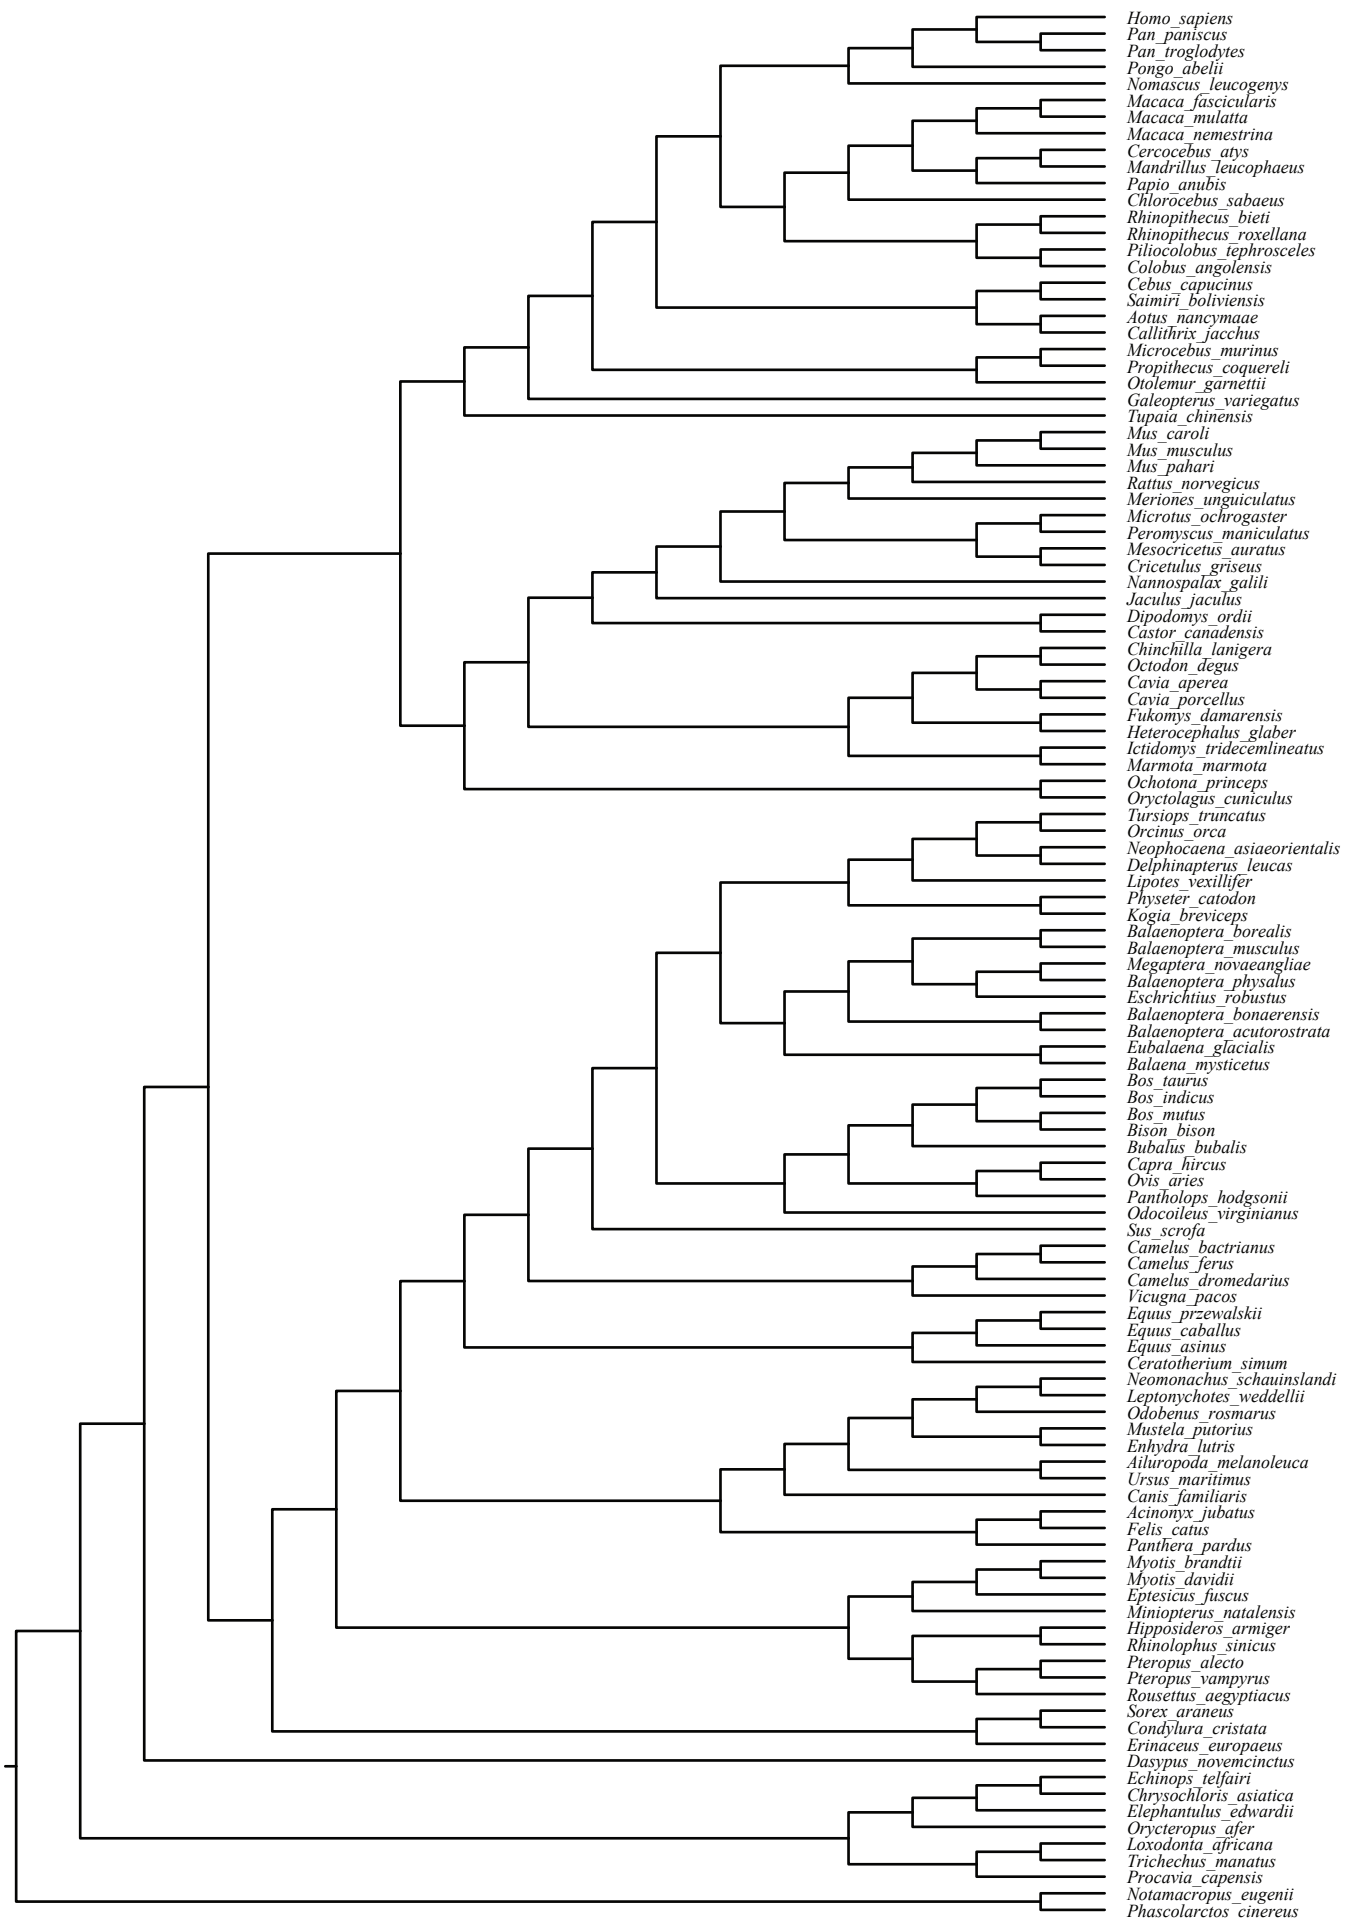

**Figure S1** The tree topology of ACPT used to conduct the selective pressure analysis in PAML. The phylogeny is based on OrthoMaM and some previous researches (Celine et al., 2019; Waddell et al., 2001; Sergey et al., 2007; Zhou et al., 2012; Gatesy et al., 2013; Kuntner et al., 2011; OrthoMaM)

**a.**

*H. sap* ATGCCCGCCTGGGGTTTTGGGGCCACCCTGCTGGACCTCTCCTGCTGCTGCTGCTGCTGGTGCTGCCACCCCGGGCCCTGCCAGAAGGA  
*C. hof* -----CCCAGGCCCTGGCGGCAGGA

*H. sap* CCCCTGGTTCGTGGCTCTGGTATTCCGCCATGGCGACCGGGCCCCGCTGGCCTCTACCCCATGGACCCACACAAGGAGGTGGCCTCC  
*C. hof* CCCCTGGGTTTCAGGGCTCTGG-----

*H. sap* ACCCTGTGGCCACGAGGCCTGGGCCAGCTGACCACGGAGGGGGTCCGCCAGCAGCTGGAGCTGGGCCGCTTCCTGAGGAGCCGCTACGAG  
*C. hof* -----

*H. sap* GCCTTCCTGAGTCCGGAGTACCGGCGGGAGGAGGTGTACATCCGCAGCACGGACTTTGACCGCACGCTGGAGAGTGCCAGGCCAACCTT  
*C. hof* -----

*H. sap* GCCGGGCTGTTTCCCGAGGCTGCTCCAGGGAGCCCCGAGGCCCGCTGG-AGGCCGATCCCGGTGCACACGGTGCCCGTGGCTGAGGATAA  
*C. hof* -----CCCGCGGCTGC-CCAGGGAGCCCCAGGGCCGCTGGCGGCCCTTCCCG-----A

*H. sap* GCTGCTGAGGTTCCCATGCGCAGCTGTCCCGATAACCACGAGCTGCTGCGGGAGGCCACCGAGGCCGCCGAGTACCAGGAGGCCCTGGA  
*C. hof* GCTGCCAGGCTCCCATGTGCCACTGTCCCACTGCCGGGAGCTGCTGCAGGGCTCCCAGAGGTGGCCACGCACCAGGCAGCTCTGGA

*H. sap* GGGCTGGACGG---GCTTCCTGAGT-----CGCCTGGAGAACTTACCGGACTGTCGCTGGTTGGAGAGCCACTGCGCAGGGCATGGA  
*C. hof* GGGCTGGATGGGGAGCGGGCTGGGTGTGGTGGAGCAGGGAGCGCTTCATGGGGCTCTCACTGGTCGGGAAGCCACTCAGCAGCGTGTGGA

*H. sap* AGGTTCTGGACACCCTCATGTGCCAGCAAGCCCACGGTCTTCCACTACCAGCCTGGGCCTCCCAGATGTCCTGCGGACTCTTGCCAGA  
*C. hof* AAGTTCTGGACACACT-----CCAGCAGGCCAGGGTCTCGCCCTCCCATCCTGGG-----TGTCTGC--ATCCTCACCAGA

*H. sap* TCTCGGCTTTGGATATTGGAGCCCACGTGGGCCCCACCCCGGGCAGCAGAGAAGGCCAGCTGACAGGGGGGATCCTGCTGAATGCTATCC

*C. hof* CCTCGGCTTTGGA-----

*H. sap* TTGCAAACCTCTCCCGGGTCCAGCGCCTGGGGCTGCCCCCTCAAGATGGTCATGTACTCAGCTCATGACAGCACCCCTGCTGGCCCTCCAGG

*C. hof* -----

*H. sap* GGGCCCTGGGCCTCTATGATGGACACACCCCGCCATATGCTGCCTGCCTCGGCTTTGAGTCCGGAAGCACCTGGGGAATCCCGCCAAAG

*C. hof* -----

*H. sap* ATGGAGGGAATGTCACCGTCTCCCTCTTCTACCGCAATGACTCCGCCCACCTGCCCCCTGCCTCTCAGCCTCCCCGGGTGCCCGCCCCCT

*C. hof* -----

*H. sap* GTCCACTAGGCCGCTTCTACCAGCTGACTGCCCCGCCCCGGCCTCCCGCCCATGGGGTCTCCTGCCATGGCCCCCTATGAGGCTGCCATCC

*C. hof* -----

*H. sap* CCCCAGCTCCAGTGGTGGCCCTGCTGGCCGGAGCTGTAGCTGTGCTGGTGGCACTCAGCTTGGGGCTGGGCCTGCTGGCCTGGAGACCAG

*C. hof* -----

*H. sap* GGTGCCTGCGGGCCTTGGGGGGCCCCGTGTGA

*C. hof* -----

b.

*H. sap* ATGGCCGGCCTGGGGTTTTGGGGCCACCCTGCTGGACCTCTCCTGCTGCTGCTGCTGCTGGTGCTGCCACCCCGGGCCCTGCCAGAAGGA  
*M. jav* -----GCCCTGACGGAAGG-  
*M. pen* -----  
*P. tri* -----GGAGG-

*H. sap* CCCCTGGTGTTCGTGGCTCTGGTATTCCGCCATGGCGACCGGGCCCCGCTGGCCTCCTACCCCATGGACCCACACAAGGAGGTGGCCTCC  
*M. jav* CCCCTGGTGTTCATGGCTGTGGT-----  
*M. pen* -----  
*P. tri* -----GTGTCCGC-----

*H. sap* ACCCTGTGGCCACGAGGCCTGGGCCAGCTGACCACGGAGGGGTCCGCCAGCAGCTGGAGCTGGGCCGCTTCCTGAGGA----GCCGCTA  
*M. jav* -----CTGCAGCTGAACAGCTTCCTGAGGA----GCCCTC  
*M. pen* -----CTTGGGTTTCAGGGCCTCCCCTGGACGGCGCCTCTT  
*P. tri* -----CCGCAGCTGGACAGCTTCCTGAGGA----GCCCTC

*H. sap* CGAGGCCTTCCTGAGTCCGGAGTACCGCGGGAGGAGGTGTACATCCGCAGCACGGACTTTGACCGCACGCTGGAGAGTGCCAGGCCAA  
*M. jav* CCAGACCTCTCTGAGCCTGGAGTACCAGAGGGAGGAGGTGCATGTTCCGCAGCC--GACTTTGGCCGGATGCTGGAGGGCGCTCAGTCCGA  
*M. pen* CCTG--TTGCTGCTCC--AGCCCTGACGGAA-----  
*P. tri* CCAGACCTTTTTGAGCCGGGAGTACCAGAGGGAGGAGGT-----

*H. sap* CCTTGCCGGGCTGTTTCCCGAGGCTGCTCCAGGGAGCCCCGAGGCCCGCTGGAGGCCGATCCCGGTGCACACGGTGCCCGTGGCTGAGGA  
*M. jav* CCT-----  
*M. pen* -----  
*P. tri* -----

*H. sap* TAAGCTGCTGAGGTTCCCCA---TGCGCAGCTGTCCCCGATAACCACGAGCTGCTGCGGGAGGCCACCGAGGCCGCCGAGTACCAGGAGGC  
*M. jav* --GGCTAGTCTGGTTC---CGAGGCCG---TACCCAGCTGCTGAGGGAGGCCACCGAGGCTACGGAGTACAAGGCGGG  
*M. pen* -----GCTCCCTGGTGTTCGTGGCTGT----GGTACCCAGCTGCTGAGGGAGGCCACCGAGGCTACGGAGTACAAGGCGGG  
*P. tri* --AGCTGCTGAGGCTCCCCA---CGCGTGCGGTCCCTCGATAACCGTGAGCTGCTGAGGGAGGCCACCGAGGCTACGGAGTACAAGGGGGA

*H. sap* CCTGGAGGGCTGGACGGGCTTCCTGAGTCGCCTGGAGAACTTCACGGGACTGTCGCTGGTTGGAGAGCCACTGCGCAGGGCATGGAAGGT  
*M. jav* CCTGAAGGCCTGGACG-----GAATTTACGGGCCCGGCGTGGTCTGGGAGCCGCTCCGCAGAGCGGGGAAGGT  
*M. pen* CCTGAAGGGCTGGAGGGACTTCCCGACTTGGGGGAGAACTTCACGAGCCGTCGCTGGTCTGGGAGCCGCTCCGCAGGGCGGGGAAGGT  
*P. tri* CCTGAAGGGCTGGACGGATTTCCCGACGCGGCTGGAGAACTTCACGAGCCTGTTGCTGGTCTGGGAGCCGCTCCGCAAGGCGTGGGAGGT

*H. sap* TCTGGACACCCTCATGTGCCAGCAAGCCCACGGTCTTCCACTACCAGCCTGGGCCTCCCCAGATGTCCTGCGGACTCTTGCCAGATCTC  
*M. jav* TCTGGACACCCTCATGCGCCA-----GTCCTCCCCTCCCATCCTGGCCTCCCCAAACGCCCTACAGACGCTAGCCAGATCTC  
*M. pen* TCTGGACACCCTGATGCGCCA-----GTCCTCCCCTCCCATCCTGGGCTCCCCAAATGCCCTACAGACACTAGCCTGGATCTC  
*P. tri* TCTGGACACCCTGATGCGCCAGCAGGCC-----GTCCTCCCCTCCCATCCTGGGCTCCCCGAATGCCCTACGGACACTAGCCAGATCTC

*H. sap* GGCTTTGGATATTGGAGCCCACGTGGGCCACCCCGGGCAGCAGAGAAGGCCAGCTGACAGGGGGATCCTGCTGAATGCTATCCTTGC  
*M. jav* AGCTTTGGATATTAAGGCTCATGTGGGCCCATCCCGGGCAGCAG---AGGCCAGCCG---AGGGG---CCTGCTGGATGCCATCCTTCC  
*M. pen* AGCTTTGGATATTAAGGCTCATGTGGGCCACCCCGGGCAGCAG---AGGCCAGCTG---AGGGGGATCCTGCTGGATACCA--CCTTCC  
*P. tri* AGCTTTGGATATTAAGGCTCATGTGGGCCACCCCGGGTAGCAAAGGAGGCCAGCTGAGTGTGG-----

*H. sap* AAATTCTCCCGGTCC--AGCGCCTGGGGCTGCCCTCAAGATGGTCATGTAICTCAGCTCATGACAGCACCCCTGCTGGCCCTCCAGGGGG  
*M. jav* CAATTCT---CAAGTCT--AGCACCTGGGGCTGCCCTCAAGATGGTCACCTACTCAGCTCATGACAGCA---CTACCAGCCCGCTGGGGG  
*M. pen* CAATTCT---CAAGTCTAAGCACCCGGGGCTGCCCTCAAGATGGTCACGTAICTCAGCTCATGACAGCA---CTACCAGCCCGCTGGGGG  
*P. tri* -----GGTCT--AGCACCTGGGGCTGCCCTCAAGATGGTCATGTAICTCAGC---CATGACAGCACACTGCCAGCCCGCTGGGAG

*H. sap* CCCTGGGCCTCTATGATGGACACACCCCGCCATATGCTGCCTGCCTCGGCTTTGAGTTCCGGAAGCACCTGGGGAATCCCGCCAAAGATG

*M. jav* TCC GGGTCTCTATGATGGGCACACCCACCATATGCCACCTGCCTCGGC  
*M. pen* CCC GGGTCTCTATGATGGGCACACCCACCATAGGCCACCTGCCTTGGC  
*P. tri* CCT GGGTCTCTGTGATGGGCACA CCCGCCGTACGCCGCCTGCCTCGGC

*H. sap* GAGGGAATGTCACCGTCTCCCTCTTCTACCGCAATGACTCCGCCACCTGCCCTGCCTCTCAGCCTCCCCGGGTGCCCGCCCCCTGTC  
*M. jav* GGAATGTCACAATCTCCCTCTTCTACTGCAATGACTGCACCGGCCTGCCTCTGCCCTCAGCCTCCCTGGGTGGCCAGACCCCTGCC  
*M. pen* GGAATGTCACCATCTCCCTCTTCTACTGCAATGACTGCACCGGCCTGCCTCTGCCCTCAGCCTCCCTGGGAGGCCAGACCCCTGCC  
*P. tri* GGAATGTCACAATCTCCCTCTTCTACTGCAATGGCTGCACTGGCTGCCTCTGCCCTCAGCCTCCGTGAGTGTGAGACCCCTGCC

*H. sap* CACTAGGCCGCTTCTACCAGCTGACTGCCCCGGCCCGCCTCCCGCCCATGGGGTCTCCTGCCATGGCCCTATGAGGCTGCCATCCCC  
*M. jav* CACTAGGCCACTTCTGCCGGCTGACTGCCCT GCCCGTCTCCAGCTCGTGGGGTGCCCTGCTACGACTCCCATGAGTTTGAATCCCC  
*M. pen* CACTAGGCCACTTCCGCCGGCTGACTGCCCT GCCCGCCTCCAGCTCGTGGGGTCCCCTGCCATGACTCCCATGAGTTTGCCATCCCTG  
*P. tri* CACTAGGCCACTTCTGCCAGCTGACTGCCCTGGCCTCCAGCTCGTGGAGTCCCCTGCCACGGCTCCCATGAGCTTGCCA-----

*H. sap* CAGCTCCAGTGGTGCCCTGCTGGC-CGGAGCTGTAGCTGTGCTGGTGGCACTCAGCTTGGGGCTGGGCCTGCTGGCCTGGAGACCAGGG  
*M. jav* CAGCCACCGTCCTGCCCCGCTGGCTTGGGGCTGCGGGTATGCCTGCAGCGCTCAGTGTGGGGCTTA-----CGAACTGGAGACCTGGC  
*M. pen* CAGGT-----  
*P. tri* -----

*H. sap* TGCCTGCGGGCCTTGGGGGGCCCCGTGTGA  
*M. jav* TGCCTGCCGGCCTGGGGAGGGCCTATGTGA  
*M. pen* -----GGTGGCCCTGTCTGG  
*P. tri* -----

**Figure S2 a. ACPT sequence comparison between human and sloth;**  
**b. ACPT sequence comparison among human and 3 pangolins**

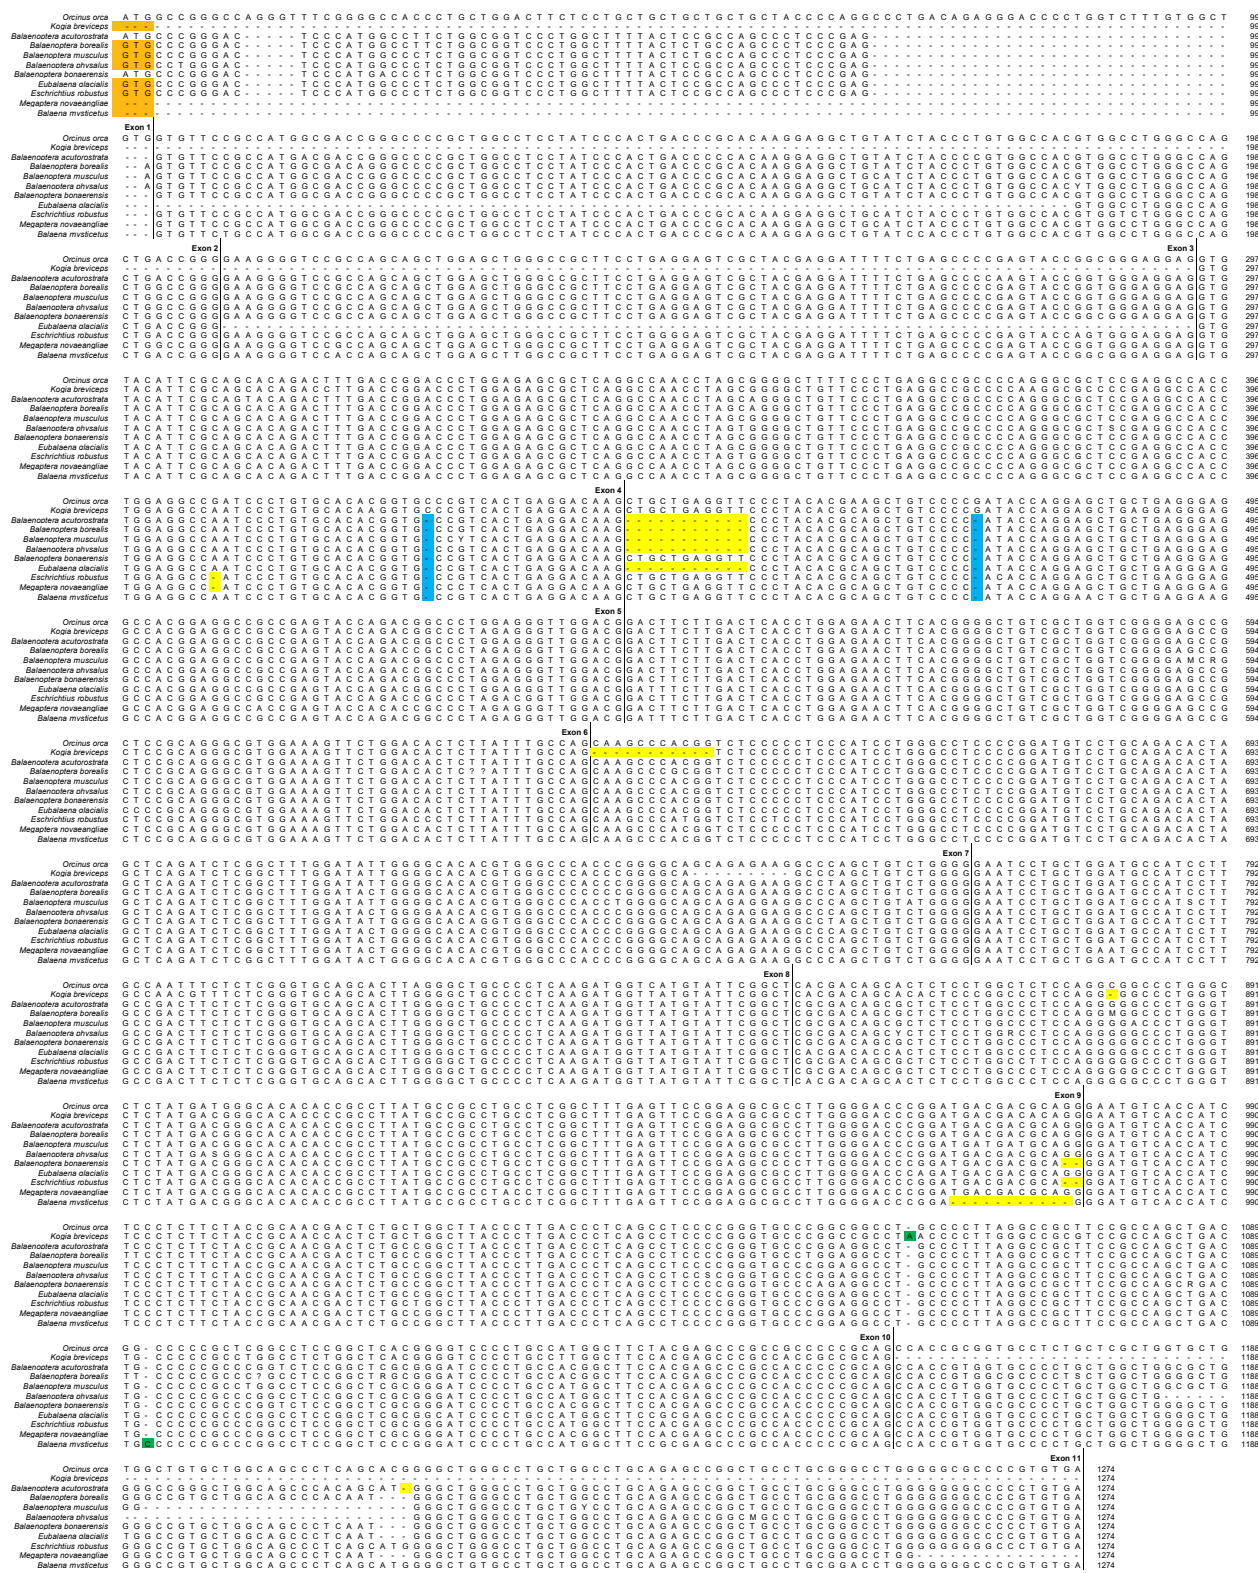

**Figure S3** The detailed information about inactivated mutation of ACPT among relative cetaceans. Orange represents initiation codon mutation, yellow represents deletion, green represents insertion, and blue represents two common deletion sites among all baleen whales.

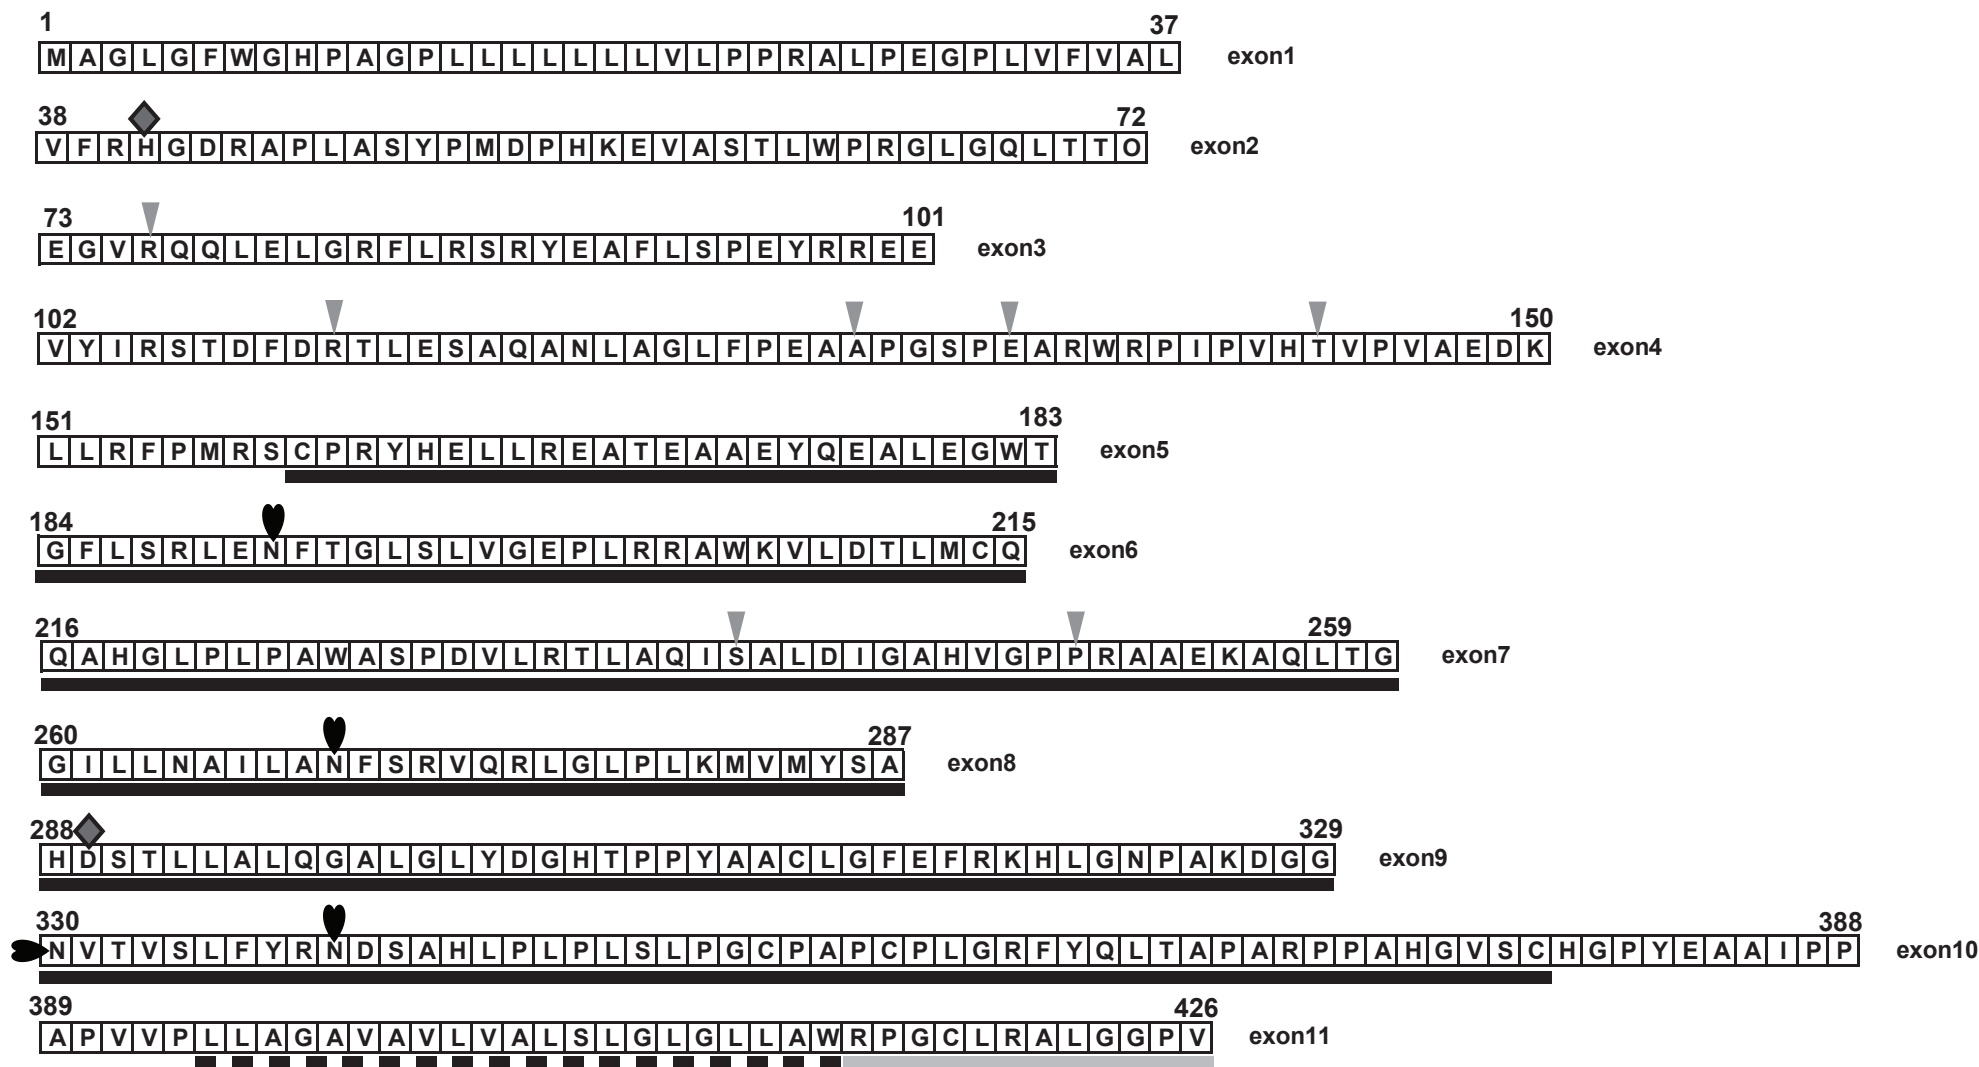

- ▼ Mutation in these sites will lead to hypoplastic AI (Seymen et al. 2016 and Smith et al. 2017)
- ◆ These sites are used for enzymes and indicates the residues directly involved in catalysis. ♥ Glycosylation
- Disulfide bond    ■ ■ ■ Transmembrane    — Intracellular

Figure S4 The information of mutation sites about amelogenesis imperfecta in ACPT protein sequence.



## References

- Celine S, Khalid B, Jimmy L, Rémy D, Frédéric D, Emmanuel JPD, Vincent R. 2019.** OrthoMaM v10: Scaling-up orthologous coding sequence and exon alignments with more than one hundred mammalian genomes. *Molecular Biology and Evolution* **36**(4):861-862.
- Gatesy J, Geisler JH, Chang J, Buell C, Berta A, Meredith RW, Springer MS, Mcgowen MR. 2013.** A phylogenetic blueprint for a modern whale. *Molecular Phylogenetics and Evolution* **66**(2):479-506.
- Kuntner M, May-Collado LJ, Agnarsson I. 2011.** Phylogeny and conservation priorities of afrotherian mammals (Afrotheria, Mammalia). *Zoologica Scripta* **40**(1):1-15.
- OrthoMaM:** [http://orthomam2.mbb.univ-montp2.fr/OrthoMaM\\_v10b10/](http://orthomam2.mbb.univ-montp2.fr/OrthoMaM_v10b10/).
- Sergey N, Montoya-Burgos JI, Margulies EH, Jacques R, Bruno N, Antonarakis SE. 2007.** Early history of mammals is elucidated with the ENCODE multiple species sequencing data. *PLoS Genetics* **3**(1):e2.
- Seymen F, Kim YJ, Lee YJ, Kang J, Kim TH, Choi H, Koruyucu M, Kasimoglu Y, Tuna EB, Gencay K. 2016.** Recessive mutations in ACPT, encoding testicular acid phosphatase, cause hypoplastic amelogenesis imperfecta. *American Journal of Human Genetics* **99**:1199-1205.
- Smith CE, Whitehouse LL, Poulter JA, Brookes SJ, Day PF, Soldani F, Kirkham J, Inglehearn CF, Mighell AJ. 2017.** Defects in the acid phosphatase ACPT cause recessive hypoplastic amelogenesis imperfecta. *European Journal of Human Genetics* **25**(8):1015-1019.
- Waddell PJ, Kishino H, Ota R. 2001.** A Phylogenetic Foundation for Comparative Mammalian Genomics. *Genome Informatics* **12**:141-154.
- Zhou XM, Xu SX, Xu JX, Chen BY, Zhou KY, Yang G. 2012.** Phylogenomic analysis resolves the interordinal relationships and rapid diversification of the laurasiatherian mammals. *Systematic Biology* **61**(1):150-164.
